# Supplementary material for: Scuba: scalable kernel-based gene prioritization
Source: PubMed Central journal article supplement (PMC5785908; doi:10.1186/s12859-018-2025-5), 2018-01-25
Supplement: 12859_2018_2025_MOESM1_ESM.pdf [file 12859_2018_2025_MOESM1_ESM.pdf]

# Scuba: scalable kernel-based gene prioritization

Guido Zampieri, Dinh Van Tran, Michele Donini, Nicolò Navarin, Fabio Aioli,  
Alessandro Sperduti, Giorgio Valle

Supplementary Material

| Disease class    | HPRD | BioGPS | Pathways | Average | Scuba |
|------------------|------|--------|----------|---------|-------|
| Cardiovascular   | 76.9 | 64.4   | 80.3     | 81.9    | 75.6  |
| Connective       | 43.7 | 52.6   | 74.0     | 69.2    | 78.3  |
| Dermatological   | 85.7 | 86.4   | 80.1     | 86.5    | 88.6  |
| Developmental    | 67.3 | 54.1   | 65.3     | 66.7    | 79.7  |
| Endocrine        | 71.7 | 69.5   | 72.9     | 78.6    | 78.4  |
| Hematological    | 79.8 | 76.6   | 62.6     | 73.9    | 89.5  |
| Immunological    | 89.8 | 75.8   | 96.3     | 96.4    | 96.4  |
| Metabolic        | 79.6 | 72.8   | 90.4     | 90.7    | 96.1  |
| Muscular         | 66.9 | 74.0   | 72.1     | 75.5    | 90.9  |
| Ophthalmological | 70.9 | 62.0   | 62.3     | 72.1    | 84.4  |
| Renal            | 78.8 | 76.8   | 75.7     | 81.9    | 84.0  |
| Skeletal         | 75.3 | 76.8   | 76.3     | 82.8    | 77.0  |
| All              | 76.9 | 71.6   | 78.1     | 81.9    | 87.6  |

Table S1: Predictive performance in the setting of Chen *et al* [1] on 12 considered disease classes in terms of AUC and using different data sources.

| Kernel function                     | kernel hyper-parameter | rank median | rank st.dev. | TPR at top 5% (%) | TPR at top 10% (%) | TPR at top 30% (%) | AUC  |
|-------------------------------------|------------------------|-------------|--------------|-------------------|--------------------|--------------------|------|
| Genome-wide prioritizations         |                        |             |              |                   |                    |                    |      |
| $\mathbf{K}_{MD}$                   | 2                      | 11.13       | 24.36        | 31.0              | 47.6               | 73.8               | 0.78 |
|                                     | 4                      | 11.11       | 24.80        | 35.7              | 45.2               | 69.0               | 0.78 |
|                                     | 6                      | 12.34       | 25.16        | 33.3              | 45.2               | 73.8               | 0.78 |
|                                     | 2,4,6                  | 11.02       | 24.48        | 33.3              | 47.6               | 73.8               | 0.78 |
| $\mathbf{K}_{RL}$                   | 1                      | 13.41       | 20.92        | 28.6              | 42.9               | 76.2               | 0.80 |
|                                     | 10                     | 11.77       | 21.15        | 31.0              | 42.9               | 78.6               | 0.81 |
|                                     | 100                    | 11.67       | 21.79        | 28.6              | 45.2               | 76.2               | 0.80 |
|                                     | 1,10,100               | 12.40       | 20.90        | 28.6              | 40.5               | 76.2               | 0.80 |
| Candidate set-based prioritizations |                        |             |              |                   |                    |                    |      |
| $\mathbf{K}_{MD}$                   | 2                      | 13.20       | 26.70        | 23.8              | 45.2               | 69.0               | 0.77 |
|                                     | 4                      | 13.20       | 27.21        | 23.8              | 47.6               | 76.2               | 0.77 |
|                                     | 6                      | 14.19       | 27.31        | 23.8              | 42.9               | 73.8               | 0.77 |
|                                     | 2,4,6                  | 13.73       | 26.88        | 26.2              | 47.6               | 73.8               | 0.77 |
| $\mathbf{K}_{RL}$                   | 1                      | 11.52       | 22.98        | 23.8              | 42.9               | 73.8               | 0.79 |
|                                     | 10                     | 11.45       | 23.25        | 26.2              | 47.6               | 76.2               | 0.80 |
|                                     | 100                    | 11.11       | 23.78        | 26.2              | 45.2               | 76.2               | 0.79 |
|                                     | 1,10,100               | 11.60       | 23.15        | 23.8              | 40.5               | 73.8               | 0.79 |

Table S2: Scuba results in the experimental setting of Börnigen *et al* [2], using String v8.2 as data source and for different choices of kernels. From the third column to the last one: rank median and standard deviation, true positive rates (TPR) in the upper 5/10/30% of the ranking and average area-under-the-ROC-curve (AUC). Ranks are normalized in order to lie in the interval  $[0, 100]$ .

| Disease                                                  | Associated genes                                      | genome-wide AUC | candidate set AUC |
|----------------------------------------------------------|-------------------------------------------------------|-----------------|-------------------|
| Abdominal aortic aneurysm                                | ENSG00000136848                                       | 0.77            | 0.84              |
| Alcohol dependence                                       | ENSG00000148680                                       | 0.98            | 0.98              |
| Arthrogryposis                                           | ENSG00000152818                                       | 0.98            | 1.0               |
| Asthma                                                   | ENSG00000182578                                       | 0.93            | 0.94              |
| Autosomal recessive primary microcephaly                 | ENSG00000075702                                       | 0.41            | 0.44              |
| Behcet's disease                                         | ENSG00000136634                                       | 0.98            | 0.97              |
| Bipolar schizoaffective disorder                         | ENSG00000146276<br>ENSG00000139618                    | 0.97            | 0.98              |
| Complex heart defect                                     | ENSG00000121068                                       | 0.98            | 1.0               |
| Congenital anomalies of the kidney and the urinary tract | ENSG00000164736<br>ENSG00000178188                    | 0.97            | 0.96              |
| Congenital diaphragmatic hernia                          | ENSG00000004961<br>ENSG00000154309                    | 0.86            | 0.87              |
| Crohn's disease                                          | ENSG00000176920<br>ENSG00000185651<br>ENSG00000069399 | 0.89            | 0.89              |
| Dursun syndrome                                          | ENSG00000141349                                       | 0.58            | 0.46              |
| Ehlers-Danlos syndrome                                   | ENSG00000169105                                       | 0.99            | 1.0               |
| Esophageal squamous cell carcinoma                       | ENSG00000138193<br>ENSG00000101276                    | 0.3             | 0.23              |
| Leprosy                                                  | ENSG00000111537                                       | 0.96            | 0.9               |
| Lung adenocarcinoma                                      | ENSG00000073282                                       | 0.89            | 0.84              |
| Methylmalonic aciduria                                   | ENSG00000167775                                       | 0.9             | 0.93              |
| Metopic craniosynostosis                                 | ENSG00000106571                                       | 0.98            | 0.98              |
| Mitochondrial complex I deficiency                       | ENSG00000177646                                       | 0.95            | 0.96              |
| Multiple sclerosis                                       | ENSG00000120088                                       | 0.83            | 0.84              |
| Myelodysplastic syndromes                                | ENSG00000106462                                       | 0.81            | 0.83              |
| Nasopharyngeal carcinoma                                 | ENSG00000085276<br>ENSG00000127863                    | 0.81            | 0.8               |
| Nonsyndromic cleft lip/palate                            | ENSG00000148175                                       | 0.82            | 0.8               |
| Parkinson's disease                                      | ENSG00000175104                                       | 0.82            | 0.8               |
| Periventricular heterotopia                              | ENSG00000102103                                       | 0.54            | 0.45              |
| Primary biliary cirrhosis                                | ENSG00000142606<br>ENSG00000142539                    | 0.82            | 0.77              |
| Psoriasis                                                | ENSG00000056972                                       | 0.96            | 1.0               |
| Retinal-renal ciliopathy                                 | ENSG00000054282                                       | 1.0             | 1.0               |
| Single-suture craniosynostosis                           | ENSG00000124813                                       | 0.98            | 0.98              |
| Smooth pursuit eye movement abnormality                  | ENSG00000099901                                       | 0.27            | 0.2               |
| Testicular germ cell tumor                               | ENSG00000137090<br>ENSG00000171681                    | 0.5             | 0.41              |
| Tetralogy of Fallot                                      | ENSG00000145012                                       | 0.74            | 0.67              |
| Type 2 diabetes                                          | ENSG00000182247                                       | 0.21            | 0.19              |

Table S3: Scuba performance for single disorders considered by Börnigen *et al* in their evaluation of gene prioritization tools [2].

| Disease                                 | Associated genes | genome-wide AUC |
|-----------------------------------------|------------------|-----------------|
| Behcet's disease                        | ENSG00000162594  | 0.87            |
|                                         | ENSG00000168811  |                 |
|                                         | ENSG00000138378  |                 |
|                                         | ENSG00000163823  |                 |
|                                         | ENSG00000136869  |                 |
|                                         | ENSG00000183542  |                 |
|                                         | ENSG00000164307  |                 |
|                                         | ENSG00000026103  |                 |
|                                         | ENSG00000206340  |                 |
|                                         | ENSG00000206450  |                 |
| ENSG00000134882                         |                  |                 |
| Bipolar schizoaffective disorder        | ENSG00000175344  | 0.68            |
|                                         | ENSG00000138592  |                 |
|                                         | ENSG00000151702  |                 |
|                                         | ENSG00000124782  |                 |
|                                         | ENSG00000171988  |                 |
| ENSG00000176986                         |                  |                 |
| Crohn's disease                         | ENSG00000140368  | 0.90            |
| Parkinson's disease                     | ENSG00000064692  | 0.89            |
|                                         | ENSG00000153234  |                 |
|                                         | ENSG00000116675  |                 |
|                                         | ENSG00000159082  |                 |
|                                         | ENSG00000184381  |                 |
| ENSG00000138246                         |                  |                 |
| Primary biliary cirrhosis               | ENSG00000128604  | 0.76            |
|                                         | ENSG00000181634  |                 |
|                                         | ENSG00000105329  |                 |
|                                         | ENSG00000110777  |                 |
|                                         | ENSG00000064419  |                 |
|                                         | ENSG00000016602  |                 |
|                                         | ENSG00000141076  |                 |
|                                         | ENSG00000106089  |                 |
| ENSG00000132912                         |                  |                 |
| Psoriasis                               | ENSG00000206237  | 0.94            |
|                                         | ENSG00000196126  |                 |
|                                         | ENSG00000179344  |                 |
|                                         | ENSG00000206306  |                 |
|                                         | ENSG00000163599  |                 |
|                                         | ENSG00000206240  |                 |
|                                         | ENSG00000077150  |                 |
| ENSG00000141527                         |                  |                 |
| ENSG00000198246                         |                  |                 |
| Smooth pursuit eye movement abnormality | ENSG00000104133  | 0.73            |
|                                         | ENSG00000171385  |                 |
|                                         | ENSG00000020922  |                 |
|                                         | ENSG00000070610  |                 |
|                                         | ENSG00000013503  |                 |
| ENSG00000167658                         |                  |                 |

Table S4: Scuba performance for single disorders considered in Table 4 in the main text. These are the multifactorial diseases employed by Börnigen *et al* [2] with at least a new gene annotation between March 2013 and February 2017 as reported by the Human Phenotype Ontology [3].

# Bibliography

- [1] Chen, B and Li, M and Wang, J and Shang, X and Wu, FX, *A fast and high performance multiple data integration algorithm for identifying human disease genes*, BMC Medical Genomics, 8(3), S2 (2015)
- [2] Börnigen, D and Tranchevent, LC and Bonachela-Capdevila, F and Devriendt, K and De Moor, B and De Causmaecker, P and Moreau, Y, *An unbiased evaluation of gene prioritization tools*, Bioinformatics, **28**(23), 3081-3088 (2012)
- [3] Köhler, S and Vasilevsky, NA and Engelstad, M and Foster, E et al, *The Human Phenotype Ontology in 2017*, Nucleic Acids Research, **45**(D1), D865 (2017)
